# Supplementary material
Source: ML conference proceedings conference paper supplement (https://proceedings.neurips.cc/paper_files/paper/2022/hash/890b206ebb79e550f3988cb8db936f42-Abstract.html)
Supplement: Supplementary file 1 [file 890b206ebb79e550f3988cb8db936f42-Supplemental-Datasets_and_Benchmarks.pdf]

# 1 A Appendix

## 2 A.1 Benchmarks

Table 1: Reviewed NLP benchmarks for languages with at least 10 million speakers. The benchmarks are sorted by the language and name.

| Name                                                   | # of tasks | Languages                   |
|--------------------------------------------------------|------------|-----------------------------|
| ALUE (Seelawi et al., 2021)                            | 6          | Arabic                      |
| CBLUE (Zhang et al., 2021)                             | 6          | Chinese                     |
| CLUE (Xu et al., 2020)                                 | 7          | Chinese                     |
| CUGE (Yao et al., 2021)                                | 13         | Chinese                     |
| FewCLUE (Xu et al., 2021)                              | 7          | Chinese                     |
| LOT (Guan et al., 2022)                                | 3          | Chinese                     |
| DecaNLP (McCann et al., 2018)                          | 9          | English                     |
| Dynabench (Kiela et al., 2021)                         | 5          | English                     |
| GLGE (Liu et al., 2021)                                | 4          | English                     |
| GLUE (Wang et al., 2018)                               | 6          | English                     |
| KILT (Petroni et al., 2021)                            | 5          | English                     |
| SentEval (Conneau and Kiela, 2018)                     | 7          | English                     |
| SuperGLUE (Wang et al., 2019)                          | 5          | English                     |
| FLUE (Le et al., 2020)                                 | 7          | French                      |
| IndicNLPsuite (Kakwani et al., 2020)                   | 10         | Indian                      |
| IndoNLG (Cahyawijaya et al., 2021)                     | 4          | Indonesian                  |
| IndoNLU (Wilie et al., 2020)                           | 7          | Indonesian                  |
| IndoLEM (Koto et al., 2020)                            | 7          | Indonesian                  |
| KLUE (Park et al., 2021)                               | 8          | Korean                      |
| KOBEST (Kim et al., 2022)                              | 5          | Korean                      |
| XGLUE (Liang et al., 2020)                             | 9          | Multilingual (13 languages) |
| GEM (Gehrmann et al., 2021)                            | 9          | Multilingual (15 languages) |
| XTREME (Hu et al., 2020)                               | 6          | Multilingual (17 languages) |
| E-KAR (Chen et al., 2022)                              | 2          | Multilingual (2 languages)  |
| (Wang et al., 2022)                                    | 3          | Multilingual (2 languages)  |
| ParsiNLU (Khashabi et al., 2021)                       | 6          | Persian                     |
| Persian NLP Benchmark (Fallahnejad and Zarezade, 2021) | 9          | Persian                     |
| KLEJ (Rybak et al., 2020)                              | 7          | Polish                      |
| PLUE (Gomes, 2020)                                     | 6          | Portugese                   |
| LiRO (Dumitrescu et al., 2021)                         | 10         | Romanian                    |
| RuMedBench (Blinov et al., 2022)                       | 4          | Russian                     |
| RussianSuperGLUE (Shavrina et al., 2020)               | 4          | Russian                     |
| GLUES (Canete et al., 2022)                            | 6          | Spanish                     |
| SpanishGLUE (Canete et al., 2022)                      | 7          | Spanish                     |
| Mukayese (Safaya et al., 2022)                         | 8          | Turkish                     |

### 3 A.2 Hyperparameter search

All hyperparameters used to create the first version of benchmark are presented in Table 2. 2

Table 2: Hyperparameters for finetuning the language models.

|                                         |                                                  |
|-----------------------------------------|--------------------------------------------------|
| <b>Max. sequence length</b>             | 512                                              |
| <b>Classifier dropout</b>               | [0.0, 0.1, 0.2, 0.3, 0.4, 0.5]                   |
| <b>No. finetuned layers</b>             | [0, 1, 2, 3, 4]                                  |
| <b>Learning rate</b>                    | [1e-6, 5e-6, 1e-5, 5e-5, 1e-4, 5e-4, 1e-3, 5e-3] |
| <b>Max. no. epochs</b>                  | [2, 3, 5, 10, 15, 20]                            |
| <b>Batch size</b>                       | [16, 32, 64]                                     |
| <b>Optimizer</b>                        | [Adam, AdamW]                                    |
| <b>Weight decay</b>                     | [1e-4, 1e-3, 1e-2, 1e-1, 0]                      |
| <b>Adam epsilon</b>                     | [1e-8, 1e-7, 1e-6, 1e-5, 1e-4]                   |
| <b>Use optimizer scheduler</b>          | [true, false]                                    |
| <b>Optimizer scheduler warmup steps</b> | [0, 25, 50, 100, 200]                            |

4

### 5 A.3 Metrics

6 In this section we provide other metrics that were calculated during experimental phase – tables 3 to  
7 12.

Table 3: Accuracy performance of evaluated models on the test subsets. We present values as the mean and standard deviations over 5 model retrains. The mean rank row is the average of a ranking established on the mean of model retrains. Values marked with **Bold** present the best results for a single dataset. Additionally, we indicate datasets previously appeared in the KLEJ benchmark with \*. **WIP** denotes the dataset for which we present preliminary results.

|                            | HerBERT<br>(base, cased) | HerBERT<br>(large, cased) | PolBERT<br>(base, cased) | PolBERT<br>(base,<br>uncased) | XLM-<br>RoBERTa<br>(paraphrase) |
|----------------------------|--------------------------|---------------------------|--------------------------|-------------------------------|---------------------------------|
| CDSC-E*                    | <b>94.02 ± 0.33</b>      | 93.92 ± 0.16              | 92.30 ± 0.25             | 93.48 ± 0.28                  | 86.58 ± 0.68                    |
| DYK*                       | <b>90.40 ± 0.78</b>      | 87.66 ± 0.22              | 87.60 ± 0.64             | 86.82 ± 0.65                  | 83.79 ± 0.88                    |
| PolEmo 2.0<br>In-Domain*   | 90.30 ± 0.28             | <b>90.55 ± 0.47</b>       | 87.53 ± 0.43             | 87.59 ± 0.81                  | 85.57 ± 0.46                    |
| PolEmo 2.0<br>Out-Domain*  | 75.06 ± 1.86             | <b>75.30 ± 1.69</b>       | 69.31 ± 2.87             | 69.84 ± 1.34                  | 57.69 ± 5.07                    |
| PSC*                       | 98.22 ± 0.20             | 98.59 ± 0.57              | <b>99.11 ± 0.11</b>      | 99.04 ± 0.08                  | 73.99 ± 0.54                    |
| Abusive<br>Clauses         | 87.04 ± 0.54             | <b>88.01 ± 0.59</b>       | 87.49 ± 0.58             | 87.13 ± 0.74                  | 86.42 ± 0.38                    |
| AspectEmo                  | 95.19 ± 0.07             | <b>95.27 ± 0.24</b>       | 94.56 ± 0.11             | 94.65 ± 0.07                  | 92.73 ± 0.25                    |
| KPWr NER                   | 97.13 ± 0.05             | <b>97.25 ± 0.04</b>       | 96.86 ± 0.04             | 95.90 ± 0.03                  | 95.74 ± 0.03                    |
| NKJP POS                   | 98.88 ± 0.02             | <b>98.98 ± 0.00</b>       | 98.77 ± 0.02             | 98.79 ± 0.02                  | 98.16 ± 0.02                    |
| PolEmo 2.0                 | 88.20 ± 0.50             | <b>90.71 ± 0.40</b>       | 87.05 ± 1.23             | 87.05 ± 0.50                  | 85.22 ± 0.70                    |
| Political<br>Advertising   | 96.46 ± 0.21             | <b>96.49 ± 0.18</b>       | 96.12 ± 0.09             | 96.38 ± 0.10                  | 95.71 ± 0.08                    |
| Punctuation<br>Restoration | 93.56 ± 0.08             | <b>94.10 ± 0.06</b>       | 91.89 ± 0.26             | 92.38 ± 0.13                  | 83.71 ± 0.19                    |
| Dialogue Acts<br>(WIP)     | 76.50 ± 0.21             | <b>77.08 ± 0.40</b>       | 76.30 ± 0.25             | 76.16 ± 0.24                  | 76.65 ± 0.75                    |
| Mean rank                  | 2.23                     | 1.31                      | 3.42                     | 3.27                          | 4.77                            |

Table 4: Micro F1 performance of evaluated models on the test subsets. We present values as the mean and standard deviations over 5 model retrains. The mean rank row is the average of a ranking established on the mean of model retrains. Values marked with **Bold** present the best results for a single dataset. Additionally, we indicate datasets previously appeared in the KLEJ benchmark with \*. **WIP** denotes the dataset for which we present preliminary results.

|                           | HerBERT<br>(base, cased) | HerBERT<br>(large, cased) | PolBERT<br>(base, cased) | PolBERT<br>(base,<br>uncased) | XLM-<br>RoBERTa<br>(paraphrase) |
|---------------------------|--------------------------|---------------------------|--------------------------|-------------------------------|---------------------------------|
| CDSC-E*                   | <b>94.02 ± 0.33</b>      | 93.92 ± 0.16              | 92.30 ± 0.25             | 93.48 ± 0.28                  | 86.58 ± 0.68                    |
| DYK*                      | <b>90.40 ± 0.78</b>      | 87.66 ± 0.22              | 87.60 ± 0.64             | 86.82 ± 0.65                  | 83.79 ± 0.88                    |
| PolEmo 2.0<br>In-Domain*  | 90.30 ± 0.28             | <b>90.55 ± 0.47</b>       | 87.53 ± 0.43             | 87.59 ± 0.81                  | 85.57 ± 0.46                    |
| PolEmo 2.0<br>Out-Domain* | 75.06 ± 1.86             | <b>75.30 ± 1.69</b>       | 69.31 ± 2.87             | 69.84 ± 1.34                  | 57.69 ± 5.07                    |
| PSC*                      | 98.22 ± 0.20             | 98.59 ± 0.57              | <b>99.11 ± 0.11</b>      | 99.04 ± 0.08                  | 73.99 ± 0.54                    |
| Abusive<br>Clauses        | 87.04 ± 0.54             | <b>88.01 ± 0.59</b>       | 87.49 ± 0.58             | 87.13 ± 0.74                  | 86.42 ± 0.38                    |
| AspectEmo                 | 58.18 ± 0.32             | <b>59.10 ± 1.32</b>       | 50.82 ± 0.42             | 51.55 ± 0.98                  | 34.07 ± 1.36                    |
| KPWr NER                  | <b>76.90 ± 0.25</b>      | 76.58 ± 0.67              | 72.59 ± 0.32             | 66.49 ± 0.09                  | 61.57 ± 0.44                    |
| NKJP POS                  | 98.88 ± 0.02             | <b>98.98 ± 0.00</b>       | 98.77 ± 0.02             | 98.79 ± 0.02                  | 98.16 ± 0.02                    |
| PolEmo 2.0                | 88.20 ± 0.50             | <b>90.71 ± 0.40</b>       | 87.05 ± 1.23             | 87.05 ± 0.50                  | 85.22 ± 0.70                    |
| Political                 | 68.02 ± 1.35             | 67.86 ± 0.88              | 65.25 ± 0.54             | <b>68.93 ± 1.31</b>           | 60.94 ± 0.71                    |
| Advertising               |                          |                           |                          |                               |                                 |
| Punctuation               | 73.23 ± 0.33             | <b>75.01 ± 0.23</b>       | 66.49 ± 0.41             | 68.56 ± 0.39                  | 21.72 ± 0.85                    |
| Restoration               |                          |                           |                          |                               |                                 |
| Dialogue Acts<br>(WIP)    | 76.50 ± 0.21             | <b>77.08 ± 0.40</b>       | 76.30 ± 0.25             | 76.16 ± 0.24                  | 76.65 ± 0.75                    |
| Mean rank                 | 2.15                     | 1.54                      | 3.42                     | 3.12                          | 4.77                            |

Table 5: Micro Precision performance of evaluated models on the test subsets. We present values as the mean and standard deviations over 5 model retrains. The mean rank row is the average of a ranking established on the mean of model retrains. Values marked with **Bold** present the best results for a single dataset. Additionally, we indicate datasets previously appeared in the KLEJ benchmark with \*. **WIP** denotes the dataset for which we present preliminary results.

|                           | HerBERT<br>(base, cased) | HerBERT<br>(large, cased) | PolBERT<br>(base, cased) | PolBERT<br>(base,<br>uncased) | XLM-<br>RoBERTa<br>(paraphrase) |
|---------------------------|--------------------------|---------------------------|--------------------------|-------------------------------|---------------------------------|
| CDSC-E*                   | <b>94.02 ± 0.33</b>      | 93.92 ± 0.16              | 92.30 ± 0.25             | 93.48 ± 0.28                  | 86.58 ± 0.68                    |
| DYK*                      | <b>90.40 ± 0.78</b>      | 87.66 ± 0.22              | 87.60 ± 0.64             | 86.82 ± 0.65                  | 83.79 ± 0.88                    |
| PolEmo 2.0<br>In-Domain*  | 90.30 ± 0.28             | <b>90.55 ± 0.47</b>       | 87.53 ± 0.43             | 87.59 ± 0.81                  | 85.57 ± 0.46                    |
| PolEmo 2.0<br>Out-Domain* | 75.06 ± 1.86             | <b>75.30 ± 1.69</b>       | 69.31 ± 2.87             | 69.84 ± 1.34                  | 57.69 ± 5.07                    |
| PSC*                      | 98.22 ± 0.20             | 98.59 ± 0.57              | <b>99.11 ± 0.11</b>      | 99.04 ± 0.08                  | 73.99 ± 0.54                    |
| Abusive<br>Clauses        | 87.04 ± 0.54             | <b>88.01 ± 0.59</b>       | 87.49 ± 0.58             | 87.13 ± 0.74                  | 86.42 ± 0.38                    |
| AspectEmo                 | 60.56 ± 0.99             | <b>61.07 ± 2.81</b>       | 55.71 ± 1.16             | 56.05 ± 1.21                  | 40.39 ± 2.12                    |
| KPWr NER                  | <b>75.09 ± 0.37</b>      | 73.85 ± 0.72              | 70.30 ± 0.34             | 64.48 ± 0.20                  | 57.28 ± 0.46                    |
| NKJP POS                  | 98.88 ± 0.02             | <b>98.98 ± 0.00</b>       | 98.77 ± 0.02             | 98.79 ± 0.02                  | 98.16 ± 0.02                    |
| PolEmo 2.0                | 88.20 ± 0.50             | <b>90.71 ± 0.40</b>       | 87.05 ± 1.23             | 87.05 ± 0.50                  | 85.22 ± 0.70                    |
| Political                 | 64.46 ± 2.95             | 64.07 ± 2.50              | 66.09 ± 2.36             | <b>68.18 ± 1.81</b>           | 58.85 ± 2.23                    |
| Advertising               |                          |                           |                          |                               |                                 |
| Punctuation               | 74.93 ± 0.33             | <b>77.33 ± 0.55</b>       | 68.50 ± 2.34             | 70.64 ± 1.64                  | 33.43 ± 1.44                    |
| Restoration               |                          |                           |                          |                               |                                 |
| Dialogue Acts<br>(WIP)    | 76.50 ± 0.21             | <b>77.08 ± 0.40</b>       | 76.30 ± 0.25             | 76.16 ± 0.24                  | 76.65 ± 0.75                    |
| Mean rank                 | 2.23                     | 1.62                      | 3.27                     | 3.12                          | 4.77                            |

Table 6: Micro Recall performance of evaluated models on the test subsets. We present values as the mean and standard deviations over 5 model retrains. The mean rank row is the average of a ranking established on the mean of model retrains. Values marked with **Bold** present the best results for a single dataset. Additionally, we indicate datasets previously appeared in the KLEJ benchmark with \*. **WIP** denotes the dataset for which we present preliminary results.

|                            | HerBERT<br>(base, cased) | HerBERT<br>(large, cased) | PolBERT<br>(base, cased) | PolBERT<br>(base,<br>uncased) | XLM-<br>RoBERTa<br>(paraphrase) |
|----------------------------|--------------------------|---------------------------|--------------------------|-------------------------------|---------------------------------|
| CDSC-E*                    | <b>94.02 ± 0.33</b>      | 93.92 ± 0.16              | 92.30 ± 0.25             | 93.48 ± 0.28                  | 86.58 ± 0.68                    |
| DYK*                       | <b>90.40 ± 0.78</b>      | 87.66 ± 0.22              | 87.60 ± 0.64             | 86.82 ± 0.65                  | 83.79 ± 0.88                    |
| PolEmo 2.0<br>In-Domain*   | 90.30 ± 0.28             | <b>90.55 ± 0.47</b>       | 87.53 ± 0.43             | 87.59 ± 0.81                  | 85.57 ± 0.46                    |
| PolEmo 2.0<br>Out-Domain*  | 75.06 ± 1.86             | <b>75.30 ± 1.69</b>       | 69.31 ± 2.87             | 69.84 ± 1.34                  | 57.69 ± 5.07                    |
| PSC*                       | 98.22 ± 0.20             | 98.59 ± 0.57              | <b>99.11 ± 0.11</b>      | 99.04 ± 0.08                  | 73.99 ± 0.54                    |
| Abusive<br>Clauses         | 87.04 ± 0.54             | <b>88.01 ± 0.59</b>       | 87.49 ± 0.58             | 87.13 ± 0.74                  | 86.42 ± 0.38                    |
| AspectEmo                  | 56.01 ± 1.09             | <b>57.31 ± 0.95</b>       | 46.74 ± 0.89             | 47.77 ± 1.76                  | 29.59 ± 2.39                    |
| KPWr NER                   | 78.80 ± 0.13             | <b>79.53 ± 0.64</b>       | 75.05 ± 0.35             | 68.63 ± 0.10                  | 66.55 ± 0.51                    |
| NKJP POS                   | 98.88 ± 0.02             | <b>98.98 ± 0.00</b>       | 98.77 ± 0.02             | 98.79 ± 0.02                  | 98.16 ± 0.02                    |
| PolEmo 2.0<br>Political    | 88.20 ± 0.50             | <b>90.71 ± 0.40</b>       | 87.05 ± 1.23             | 87.05 ± 0.50                  | 85.22 ± 0.70                    |
| Advertising                | 72.09 ± 0.70             | <b>72.21 ± 1.17</b>       | 64.53 ± 1.70             | 69.70 ± 1.12                  | 63.30 ± 1.99                    |
| Punctuation<br>Restoration | 71.61 ± 0.38             | <b>72.84 ± 0.81</b>       | 64.70 ± 1.99             | 66.65 ± 1.74                  | 16.10 ± 0.74                    |
| Dialogue Acts<br>(WIP)     | 76.50 ± 0.21             | <b>77.08 ± 0.40</b>       | 76.30 ± 0.25             | 76.16 ± 0.24                  | 76.65 ± 0.75                    |
| Mean rank                  | 2.23                     | 1.31                      | 3.42                     | 3.27                          | 4.77                            |

Table 7: Macro F1 performance of evaluated models on the test subsets. We present values as the mean and standard deviations over 5 model retrains. The mean rank row is the average of a ranking established on the mean of model retrains. Values marked with **Bold** present the best results for a single dataset. Additionally, we indicate datasets previously appeared in the KLEJ benchmark with \*. **WIP** denotes the dataset for which we present preliminary results.

|                            | HerBERT<br>(base, cased) | HerBERT<br>(large, cased) | PolBERT<br>(base, cased) | PolBERT<br>(base,<br>uncased) | XLM-<br>RoBERTa<br>(paraphrase) |
|----------------------------|--------------------------|---------------------------|--------------------------|-------------------------------|---------------------------------|
| CDSC-E*                    | <b>90.96 ± 0.73</b>      | 90.48 ± 0.20              | 88.95 ± 0.31             | 90.62 ± 0.27                  | 82.62 ± 0.88                    |
| DYK*                       | <b>82.39 ± 1.43</b>      | 79.58 ± 0.59              | 75.87 ± 0.98             | 74.41 ± 1.15                  | 58.93 ± 7.98                    |
| PolEmo 2.0<br>In-Domain*   | 88.10 ± 0.36             | <b>88.34 ± 0.63</b>       | 85.32 ± 0.45             | 85.71 ± 0.40                  | 83.75 ± 0.45                    |
| PolEmo 2.0<br>Out-Domain*  | <b>57.31 ± 2.93</b>      | 57.08 ± 2.03              | 54.10 ± 3.82             | 54.29 ± 1.83                  | 45.12 ± 3.40                    |
| PSC*                       | 97.90 ± 0.24             | 98.33 ± 0.69              | <b>98.95 ± 0.13</b>      | 98.87 ± 0.10                  | 58.85 ± 1.49                    |
| Abusive<br>Clauses         | 85.66 ± 0.58             | <b>86.57 ± 0.91</b>       | 85.93 ± 0.66             | 85.74 ± 0.86                  | 84.32 ± 0.71                    |
| AspectEmo                  | 37.28 ± 0.71             | <b>39.44 ± 1.74</b>       | 30.01 ± 0.58             | 31.48 ± 1.06                  | 18.42 ± 0.98                    |
| KPWr NER                   | <b>54.22 ± 0.76</b>      | 52.68 ± 1.39              | 48.01 ± 0.76             | 40.21 ± 0.50                  | 36.13 ± 0.44                    |
| NKJP POS                   | 94.59 ± 0.56             | <b>96.14 ± 0.38</b>       | 94.34 ± 0.61             | 94.54 ± 0.19                  | 90.29 ± 0.51                    |
| PolEmo 2.0<br>Political    | 86.78 ± 0.79             | <b>89.33 ± 0.49</b>       | 85.89 ± 1.25             | 85.83 ± 0.47                  | 84.12 ± 0.47                    |
| Advertising                | 61.42 ± 1.38             | 62.16 ± 0.14              | 58.94 ± 1.92             | <b>62.52 ± 1.23</b>           | 56.68 ± 0.94                    |
| Punctuation<br>Restoration | 45.59 ± 0.38             | <b>46.68 ± 0.61</b>       | 38.89 ± 0.91             | 41.31 ± 0.59                  | 14.33 ± 1.94                    |
| Dialogue Acts<br>(WIP)     | 49.54 ± 0.74             | <b>51.11 ± 0.85</b>       | 50.20 ± 1.32             | 48.87 ± 0.90                  | 49.05 ± 0.39                    |
| Mean rank                  | 2.15                     | 1.62                      | 3.23                     | 3.08                          | 4.92                            |

Table 8: Macro Precision performance of evaluated models on the test subsets. We present values as the mean and standard deviations over 5 model retrains. The mean rank row is the average of a ranking established on the mean of model retrains. Values marked with **Bold** present the best results for a single dataset. Additionally, we indicate datasets previously appeared in the KLEJ benchmark with \*. **WIP** denotes the dataset for which we present preliminary results.

|                           | HerBERT<br>(base, cased) | HerBERT<br>(large, cased) | PolBERT<br>(base, cased) | PolBERT<br>(base,<br>uncased) | XLM-<br>RoBERTa<br>(paraphrase) |
|---------------------------|--------------------------|---------------------------|--------------------------|-------------------------------|---------------------------------|
| CDSC-E*                   | 92.24 ± 0.81             | <b>92.83 ± 0.69</b>       | 89.91 ± 1.30             | 91.20 ± 0.92                  | 80.18 ± 1.24                    |
| DYK*                      | <b>83.47 ± 1.57</b>      | 77.85 ± 0.34              | 78.90 ± 1.65             | 77.30 ± 1.94                  | 66.03 ± 13.81                   |
| PolEmo 2.0<br>In-Domain*  | 89.40 ± 0.55             | <b>89.60 ± 0.95</b>       | 85.99 ± 0.53             | 85.86 ± 0.95                  | 83.86 ± 0.39                    |
| PolEmo 2.0<br>Out-Domain* | 59.01 ± 1.95             | <b>59.29 ± 1.80</b>       | 56.17 ± 2.23             | 56.94 ± 1.52                  | 52.14 ± 2.03                    |
| PSC*                      | 97.81 ± 0.23             | 98.42 ± 0.34              | <b>98.87 ± 0.11</b>      | 98.64 ± 0.08                  | 74.30 ± 0.90                    |
| Abusive<br>Clauses        | 84.94 ± 0.57             | <b>86.08 ± 0.46</b>       | 85.54 ± 0.64             | 85.18 ± 0.71                  | 84.99 ± 0.97                    |
| AspectEmo                 | 40.08 ± 1.12             | 41.70 ± 3.99              | <b>43.69 ± 3.19</b>      | 37.97 ± 3.17                  | 23.57 ± 2.15                    |
| KPWr NER                  | <b>55.97 ± 1.02</b>      | 53.07 ± 1.77              | 50.45 ± 1.32             | 45.00 ± 1.25                  | 36.64 ± 0.35                    |
| NKJP POS                  | 95.91 ± 0.82             | <b>97.23 ± 0.38</b>       | 96.59 ± 0.73             | 96.99 ± 0.23                  | 92.50 ± 1.17                    |
| PolEmo 2.0<br>Political   | 87.23 ± 0.43             | <b>90.04 ± 0.61</b>       | 86.20 ± 1.38             | 86.09 ± 0.61                  | 84.41 ± 0.82                    |
| Advertising               | 58.82 ± 3.33             | 59.62 ± 1.33              | 60.89 ± 3.68             | <b>62.93 ± 1.75</b>           | 54.68 ± 2.62                    |
| Punctuation               | 49.48 ± 0.26             | <b>53.19 ± 0.97</b>       | 46.22 ± 2.05             | 50.29 ± 6.67                  | 23.85 ± 1.64                    |
| Restoration               | 52.83 ± 0.97             | <b>53.61 ± 1.10</b>       | 52.38 ± 1.06             | 50.95 ± 1.10                  | 52.47 ± 1.65                    |
| Dialogue Acts<br>(WIP)    |                          |                           |                          |                               |                                 |
| Mean rank                 | 2.69                     | 1.62                      | 2.77                     | 3.15                          | 4.77                            |

Table 9: Macro Recall performance of evaluated models on the test subsets. We present values as the mean and standard deviations over 5 model retrains. The mean rank row is the average of a ranking established on the mean of model retrains. Values marked with **Bold** present the best results for a single dataset. Additionally, we indicate datasets previously appeared in the KLEJ benchmark with \*. **WIP** denotes the dataset for which we present preliminary results.

|                           | HerBERT<br>(base, cased) | HerBERT<br>(large, cased) | PolBERT<br>(base, cased) | PolBERT<br>(base,<br>uncased) | XLM-<br>RoBERTa<br>(paraphrase) |
|---------------------------|--------------------------|---------------------------|--------------------------|-------------------------------|---------------------------------|
| CDSC-E*                   | 89.92 ± 0.94             | 88.51 ± 0.67              | 88.33 ± 1.09             | <b>90.15 ± 0.52</b>           | 85.78 ± 1.95                    |
| DYK*                      | 81.45 ± 1.58             | <b>81.95 ± 1.61</b>       | 73.77 ± 0.94             | 72.52 ± 1.69                  | 58.11 ± 5.10                    |
| PolEmo 2.0<br>In-Domain*  | 87.40 ± 0.33             | <b>87.62 ± 0.86</b>       | 84.83 ± 0.56             | 85.75 ± 0.23                  | 83.71 ± 0.67                    |
| PolEmo 2.0<br>Out-Domain* | <b>60.99 ± 11.77</b>     | 56.17 ± 1.53              | <b>71.26 ± 13.42</b>     | 66.69 ± 13.84                 | 42.76 ± 3.81                    |
| PSC*                      | 98.00 ± 0.33             | 98.25 ± 1.02              | 99.03 ± 0.15             | <b>99.10 ± 0.15</b>           | 59.35 ± 1.01                    |
| Abusive<br>Clauses        | 86.91 ± 1.09             | <b>87.37 ± 1.73</b>       | 86.51 ± 1.04             | 87.01 ± 1.81                  | 84.06 ± 1.76                    |
| AspectEmo                 | 37.36 ± 0.72             | <b>39.80 ± 1.30</b>       | 27.54 ± 0.69             | 29.80 ± 0.99                  | 16.06 ± 1.17                    |
| KPWr NER                  | <b>55.74 ± 0.71</b>      | 55.52 ± 1.47              | 49.03 ± 0.55             | 40.81 ± 0.27                  | 38.60 ± 0.47                    |
| NKJP POS                  | 93.95 ± 0.64             | <b>95.39 ± 0.45</b>       | 93.18 ± 0.50             | 93.28 ± 0.12                  | 88.86 ± 0.33                    |
| PolEmo 2.0<br>Political   | 86.50 ± 1.00             | <b>88.94 ± 0.39</b>       | 85.68 ± 1.13             | 85.63 ± 0.40                  | 83.95 ± 0.36                    |
| Advertising               | 65.04 ± 1.05             | <b>65.60 ± 1.59</b>       | 57.70 ± 1.62             | 62.72 ± 1.13                  | 59.55 ± 1.23                    |
| Punctuation               | 43.16 ± 0.36             | <b>43.56 ± 1.06</b>       | 35.50 ± 1.27             | 38.11 ± 0.98                  | 10.71 ± 1.90                    |
| Restoration               | 49.54 ± 1.16             | <b>51.79 ± 0.71</b>       | 50.91 ± 1.45             | 49.58 ± 0.81                  | 49.36 ± 0.84                    |
| Dialogue Acts<br>(WIP)    |                          |                           |                          |                               |                                 |
| Mean rank                 | 2.38                     | 1.62                      | 3.31                     | 2.77                          | 4.92                            |

Table 10: Weighted F1 performance of evaluated models on the test subsets. We present values as the mean and standard deviations over 5 model retrains. The mean rank row is the average of a ranking established on the mean of model retrains. Values marked with **Bold** present the best results for a single dataset. Additionally, we indicate datasets previously appeared in the KLEJ benchmark with \*. **WIP** denotes the dataset for which we present preliminary results.

|                            | HerBERT<br>(base, cased) | HerBERT<br>(large, cased) | PolBERT<br>(base, cased) | PolBERT<br>(base,<br>uncased) | XLM-<br>RoBERTa<br>(paraphrase) |
|----------------------------|--------------------------|---------------------------|--------------------------|-------------------------------|---------------------------------|
| CDSC-E*                    | <b>93.93 ± 0.32</b>      | 93.80 ± 0.18              | 92.16 ± 0.24             | 93.42 ± 0.25                  | 86.83 ± 0.54                    |
| DYK*                       | <b>90.25 ± 0.79</b>      | 88.08 ± 0.21              | 87.00 ± 0.58             | 86.20 ± 0.56                  | 80.06 ± 2.89                    |
| PolEmo 2.0<br>In-Domain*   | 89.90 ± 0.28             | <b>90.20 ± 0.51</b>       | 87.33 ± 0.45             | 87.64 ± 0.53                  | 85.69 ± 0.40                    |
| PolEmo 2.0<br>Out-Domain*  | 75.61 ± 2.84             | <b>76.10 ± 2.67</b>       | 69.68 ± 3.43             | 71.05 ± 1.20                  | 60.33 ± 4.55                    |
| PSC*                       | 98.22 ± 0.20             | 98.59 ± 0.58              | <b>99.11 ± 0.11</b>      | 99.04 ± 0.08                  | 68.62 ± 1.00                    |
| Abusive<br>Clauses         | 87.22 ± 0.51             | <b>88.11 ± 0.69</b>       | 87.57 ± 0.57             | 87.29 ± 0.73                  | 86.32 ± 0.46                    |
| AspectEmo                  | 58.27 ± 0.40             | <b>59.16 ± 1.02</b>       | 50.38 ± 0.39             | 51.50 ± 0.95                  | 33.45 ± 1.42                    |
| KPWr NER                   | <b>77.09 ± 0.24</b>      | 77.02 ± 0.69              | 72.47 ± 0.27             | 65.97 ± 0.17                  | 61.84 ± 0.47                    |
| NKJP POS                   | 98.88 ± 0.02             | <b>98.98 ± 0.00</b>       | 98.76 ± 0.02             | 98.79 ± 0.02                  | 98.16 ± 0.02                    |
| PolEmo 2.0<br>Political    | 88.02 ± 0.61             | <b>90.44 ± 0.41</b>       | 86.99 ± 1.18             | 87.08 ± 0.49                  | 85.17 ± 0.53                    |
| Advertising                | 68.10 ± 1.34             | 68.10 ± 0.83              | 65.28 ± 0.56             | <b>68.89 ± 1.33</b>           | 60.97 ± 0.61                    |
| Punctuation<br>Restoration | 72.41 ± 0.30             | <b>73.77 ± 0.26</b>       | 65.29 ± 0.48             | 67.29 ± 0.38                  | 21.44 ± 0.78                    |
| Dialogue Acts<br>(WIP)     | 75.57 ± 0.30             | <b>76.03 ± 0.18</b>       | 75.43 ± 0.25             | 75.21 ± 0.21                  | 75.59 ± 0.59                    |
| Mean rank                  | 2.19                     | 1.5                       | 3.46                     | 3.08                          | 4.77                            |

Table 11: Weighted Precision performance of evaluated models on the test subsets. We present values as the mean and standard deviations over 5 model retrains. The mean rank row is the average of a ranking established on the mean of model retrains. Values marked with **Bold** present the best results for a single dataset. Additionally, we indicate datasets previously appeared in the KLEJ benchmark with \*. **WIP** denotes the dataset for which we present preliminary results.

|                            | HerBERT<br>(base, cased) | HerBERT<br>(large, cased) | PolBERT<br>(base, cased) | PolBERT<br>(base,<br>uncased) | XLM-<br>RoBERTa<br>(paraphrase) |
|----------------------------|--------------------------|---------------------------|--------------------------|-------------------------------|---------------------------------|
| CDSC-E*                    | <b>93.98 ± 0.36</b>      | 93.90 ± 0.16              | 92.21 ± 0.24             | 93.43 ± 0.29                  | 87.47 ± 0.67                    |
| DYK*                       | <b>90.16 ± 0.81</b>      | 88.78 ± 0.50              | 86.78 ± 0.64             | 85.98 ± 0.64                  | 78.95 ± 5.62                    |
| PolEmo 2.0<br>In-Domain*   | 89.90 ± 0.31             | <b>90.22 ± 0.57</b>       | 87.27 ± 0.48             | 87.84 ± 0.32                  | 85.86 ± 0.37                    |
| PolEmo 2.0<br>Out-Domain*  | 77.90 ± 2.30             | <b>78.62 ± 2.63</b>       | 72.96 ± 2.41             | 74.62 ± 1.55                  | 69.00 ± 2.77                    |
| PSC*                       | 98.23 ± 0.20             | 98.60 ± 0.56              | <b>99.11 ± 0.11</b>      | 99.05 ± 0.09                  | 74.15 ± 0.69                    |
| Abusive<br>Clauses         | 87.83 ± 0.67             | <b>88.46 ± 0.93</b>       | 87.81 ± 0.55             | 88.05 ± 1.07                  | 86.55 ± 0.42                    |
| AspectEmo                  | 61.79 ± 1.23             | <b>62.07 ± 2.14</b>       | 56.96 ± 1.27             | 57.36 ± 1.69                  | 39.70 ± 1.43                    |
| KPWr NER                   | <b>76.43 ± 0.35</b>      | 75.60 ± 0.74              | 71.13 ± 0.25             | 65.41 ± 0.30                  | 58.98 ± 0.43                    |
| NKJP POS                   | 98.88 ± 0.02             | <b>98.99 ± 0.00</b>       | 98.77 ± 0.02             | 98.80 ± 0.02                  | 98.16 ± 0.02                    |
| PolEmo 2.0<br>Political    | 87.98 ± 0.60             | <b>90.41 ± 0.43</b>       | 87.00 ± 1.11             | 87.18 ± 0.46                  | 85.22 ± 0.50                    |
| Advertising                | 64.97 ± 3.06             | 64.93 ± 2.40              | 66.61 ± 2.34             | <b>68.50 ± 1.87</b>           | 59.17 ± 2.21                    |
| Punctuation<br>Restoration | 73.94 ± 0.27             | <b>76.80 ± 0.49</b>       | 67.80 ± 1.84             | 69.84 ± 1.76                  | 32.96 ± 1.15                    |
| Dialogue Acts<br>(WIP)     | 75.96 ± 0.47             | <b>76.30 ± 0.34</b>       | 75.75 ± 0.55             | 75.20 ± 0.27                  | 75.99 ± 0.86                    |
| Mean rank                  | 2.15                     | 1.62                      | 3.46                     | 3.0                           | 4.77                            |

Table 12: Weighted Recall performance of evaluated models on the test subsets. We present values as the mean and standard deviations over 5 model retrains. The mean rank row is the average of a ranking established on the mean of model retrains. Values marked with **Bold** present the best results for a single dataset. Additionally, we indicate datasets previously appeared in the KLEJ benchmark with \*. **WIP** denotes the dataset for which we present preliminary results.

|                            | HerBERT<br>(base, cased) | HerBERT<br>(large, cased) | PolBERT<br>(base, cased) | PolBERT<br>(base,<br>uncased) | XLM-<br>RoBERTa<br>(paraphrase) |
|----------------------------|--------------------------|---------------------------|--------------------------|-------------------------------|---------------------------------|
| CDSC-E*                    | <b>94.02 ± 0.33</b>      | 93.92 ± 0.16              | 92.30 ± 0.25             | 93.48 ± 0.28                  | 86.58 ± 0.68                    |
| DYK*                       | <b>90.40 ± 0.78</b>      | 87.66 ± 0.22              | 87.60 ± 0.64             | 86.82 ± 0.65                  | 83.79 ± 0.88                    |
| PolEmo 2.0<br>In-Domain*   | 90.30 ± 0.28             | <b>90.55 ± 0.47</b>       | 87.53 ± 0.43             | 87.59 ± 0.81                  | 85.57 ± 0.46                    |
| PolEmo 2.0<br>Out-Domain*  | 75.06 ± 1.86             | <b>75.30 ± 1.69</b>       | 69.31 ± 2.87             | 69.84 ± 1.34                  | 57.69 ± 5.07                    |
| PSC*                       | 98.22 ± 0.20             | 98.59 ± 0.57              | <b>99.11 ± 0.11</b>      | 99.04 ± 0.08                  | 73.99 ± 0.54                    |
| Abusive<br>Clauses         | 87.04 ± 0.54             | <b>88.01 ± 0.59</b>       | 87.49 ± 0.58             | 87.13 ± 0.74                  | 86.42 ± 0.38                    |
| AspectEmo                  | 56.01 ± 1.09             | <b>57.31 ± 0.95</b>       | 46.74 ± 0.89             | 47.77 ± 1.76                  | 29.59 ± 2.39                    |
| KPWr NER                   | 78.80 ± 0.13             | <b>79.53 ± 0.64</b>       | 75.05 ± 0.35             | 68.63 ± 0.10                  | 66.55 ± 0.51                    |
| NKJP POS                   | 98.88 ± 0.02             | <b>98.98 ± 0.00</b>       | 98.77 ± 0.02             | 98.79 ± 0.02                  | 98.16 ± 0.02                    |
| PolEmo 2.0                 | 88.20 ± 0.50             | <b>90.71 ± 0.40</b>       | 87.05 ± 1.23             | 87.05 ± 0.50                  | 85.22 ± 0.70                    |
| Political<br>Advertising   | 72.09 ± 0.70             | <b>72.21 ± 1.17</b>       | 64.53 ± 1.70             | 69.70 ± 1.12                  | 63.30 ± 1.99                    |
| Punctuation<br>Restoration | 71.61 ± 0.38             | <b>72.84 ± 0.81</b>       | 64.70 ± 1.99             | 66.65 ± 1.74                  | 16.10 ± 0.74                    |
| Dialogue Acts<br>(WIP)     | 76.50 ± 0.21             | <b>77.08 ± 0.40</b>       | 76.30 ± 0.25             | 76.16 ± 0.24                  | 76.65 ± 0.75                    |
| Mean rank                  | 2.23                     | 1.31                      | 3.42                     | 3.27                          | 4.77                            |

## 8 References

- 9 Pavel Blinov, Arina Reshetnikova, Aleksandr Nesterov, Galina Zubkova, and Vladimir Kokh.  
10 2022. Rumedbench: A russian medical language understanding benchmark. *arXiv preprint*  
11 *arXiv:2201.06499*.
- 12 Samuel Cahyawijaya, Genta Indra Winata, Bryan Wilie, Karissa Vincentio, Xiaohong Li, Adhiguna  
13 Kuncoro, Sebastian Ruder, Zhi Yuan Lim, Syafri Bahar, Masayu Khodra, et al. 2021. Indonlg:  
14 Benchmark and resources for evaluating indonesian natural language generation. In *Proceedings*  
15 *of the 2021 Conference on Empirical Methods in Natural Language Processing*, pages 8875–8898.
- 16 José Canete, Gabriel Chaperon, Rodrigo Fuentes, Jou-Hui Ho, Hojin Kang, and Jorge Pérez. 2022.  
17 Spanish pre-trained bert model and evaluation data. In *Proceedings of the Practical Machine*  
18 *Learning for Developing Countries @ ICLR 2022*.
- 19 Jiangjie Chen, Rui Xu, Ziquan Fu, Wei Shi, Zhongqiao Li, Xinbo Zhang, Changzhi Sun, Lei Li,  
20 Yanghua Xiao, and Hao Zhou. 2022. E-kar: A benchmark for rationalizing natural language  
21 analogical reasoning. In *Findings of the Association for Computational Linguistics: ACL 2022*,  
22 pages 3941–3955.
- 23 Alexis Conneau and Douwe Kiela. 2018. Senteval: An evaluation toolkit for universal sentence  
24 representations. *arXiv preprint arXiv:1803.05449*.
- 25 Stefan Daniel Dumitrescu, Petru Rebeja, Beata Lorincz, Mihaela Gaman, Andrei Avram, Mihai Ilie,  
26 Andrei Pruteanu, Adriana Stan, Lorena Rosia, Cristina Iacobescu, et al. 2021. Liro: Benchmark  
27 and leaderboard for romanian language tasks. In *Thirty-fifth Conference on Neural Information*  
28 *Processing Systems Datasets and Benchmarks Track (Round 1)*.
- 29 Zohreh Fallahnejad and Ali Zarezade. 2021. Persian nlp benchmark. [https://github.com/  
30 Mofid-AI/persian-nlp-benchmark#persian-nlp-benchmark](https://github.com/Mofid-AI/persian-nlp-benchmark#persian-nlp-benchmark).
- 31 Sebastian Gehrmann, Tosin Adewumi, Karmanya Aggarwal, Pawan Sasanka Ammanamanchi, An-  
32 uoluwapo Aremu, Antoine Bosselut, Khyathi Raghavi Chandu, Miruna-Adriana Clinciu, Dipanjan  
33 Das, Kaustubh Dhole, et al. 2021. The gem benchmark: Natural language generation, its evaluation  
34 and metrics. In *Proceedings of the 1st Workshop on Natural Language Generation, Evaluation,*  
35 *and Metrics (GEM 2021)*, pages 96–120.
- 36 J. R. S. Gomes. 2020. Plue: Portuguese language understanding evaluation. [https://github.com/  
37 jubs12/PLUE](https://github.com/jubs12/PLUE).
- 38 Jian Guan, Zhuoer Feng, Yamei Chen, Ruilin He, Xiaoxi Mao, Changjie Fan, and Minlie Huang. 2022.  
39 Lot: A story-centric benchmark for evaluating chinese long text understanding and generation.  
40 *Transactions of the Association for Computational Linguistics*, 10:434–451.
- 41 Junjie Hu, Sebastian Ruder, Aditya Siddhant, Graham Neubig, Orhan Firat, and Melvin Johnson. 2020.  
42 Xtreme: A massively multilingual multi-task benchmark for evaluating cross-lingual generalisation.  
43 In *International Conference on Machine Learning*, pages 4411–4421. PMLR.
- 44 Divyanshu Kakwani, Anoop Kunchukuttan, Satish Golla, NC Gokul, Avik Bhattacharyya, Mitesh M  
45 Khapra, and Pratyush Kumar. 2020. Indicnlpsuite: Monolingual corpora, evaluation benchmarks  
46 and pre-trained multilingual language models for indian languages. In *Findings of the Association*  
47 *for Computational Linguistics: EMNLP 2020*, pages 4948–4961.
- 48 Daniel Khashabi, Arman Cohan, Siamak Shakeri, Pedram Hosseini, Pouya Pezeshkpour, Malihe  
49 Alikhani, Moin Aminnaseri, Marzieh Bitaab, Faeze Brahman, Sarik Ghazarian, et al. 2021. Parsinlu:  
50 A suite of language understanding challenges for persian. *Transactions of the Association for*  
51 *Computational Linguistics*, 9:1147–1162.
- 52 Douwe Kiela, Max Bartolo, Yixin Nie, Divyansh Kaushik, Atticus Geiger, Zhengxuan Wu, Bertie  
53 Vidgen, Grusha Prasad, Amanpreet Singh, Pratik Ringshia, et al. 2021. Dynabench: Rethinking  
54 benchmarking in nlp. In *Proceedings of the 2021 Conference of the North American Chapter of*  
55 *the Association for Computational Linguistics: Human Language Technologies*, pages 4110–4124.



- 56 Dohyeong Kim, Myeongjun Jang, Deuk Sin Kwon, and Eric Davis. 2022. Kobest: Korean balanced  
57 evaluation of significant tasks. *arXiv preprint arXiv:2204.04541*.
- 58 Fajri Koto, Afshin Rahimi, Jey Han Lau, and Timothy Baldwin. 2020. Indolem and indobert: A  
59 benchmark dataset and pre-trained language model for indonesian nlp. In *Proceedings of the 28th*  
60 *International Conference on Computational Linguistics*, pages 757–770.
- 61 Hang Le, Loïc Vial, Jibril Frej, Vincent Segonne, Maximin Coavoux, Benjamin Lecouteux, Alexandre  
62 Allauzen, Benoît Crabbé, Laurent Besacier, and Didier Schwab. 2020. Flaubert: Unsupervised  
63 language model pre-training for french. In *Proceedings of the 12th Language Resources and*  
64 *Evaluation Conference*, pages 2479–2490.
- 65 Yaobo Liang, Nan Duan, Yeyun Gong, Ning Wu, Fenfei Guo, Weizhen Qi, Ming Gong, Linjun Shou,  
66 Daxin Jiang, Guihong Cao, Xiaodong Fan, Ruofei Zhang, Rahul Agrawal, Edward Cui, Sining Wei,  
67 Taroon Bharti, Ying Qiao, Jiun-Hung Chen, Winnie Wu, Shuguang Liu, Fan Yang, Daniel Campos,  
68 Rangan Majumder, and Ming Zhou. 2020. XGLUE: A new benchmark dataset for cross-lingual  
69 pre-training, understanding and generation. In *Proceedings of the 2020 Conference on Empirical*  
70 *Methods in Natural Language Processing (EMNLP)*, pages 6008–6018, Online. Association for  
71 Computational Linguistics.
- 72 Dayiheng Liu, Yu Yan, Yeyun Gong, Weizhen Qi, Hang Zhang, Jian Jiao, Weizhu Chen, Jie Fu,  
73 Linjun Shou, Ming Gong, et al. 2021. Glge: A new general language generation evaluation  
74 benchmark. In *Findings of the Association for Computational Linguistics: ACL-IJCNLP 2021*,  
75 pages 408–420.
- 76 Bryan McCann, Nitish Shirish Keskar, Caiming Xiong, and Richard Socher. 2018. The natural  
77 language decathlon: Multitask learning as question answering. *arXiv preprint arXiv:1806.08730*.
- 78 Sungjoon Park, Jihyung Moon, Sungdong Kim, Won Ik Cho, Jiyoung Han, Jangwon Park, Chisung  
79 Song, Junseong Kim, Yongsook Song, Taehwan Oh, et al. 2021. Klue: Korean language under-  
80 standing evaluation. *arXiv preprint arXiv:2105.09680*.
- 81 Fabio Petroni, Aleksandra Piktus, Angela Fan, Patrick Lewis, Majid Yazdani, Nicola De Cao, James  
82 Thorne, Yacine Jernite, Vladimir Karpukhin, Jean Maillard, et al. 2021. Kilt: a benchmark for  
83 knowledge intensive language tasks. In *Proceedings of the 2021 Conference of the North American*  
84 *Chapter of the Association for Computational Linguistics: Human Language Technologies*, pages  
85 2523–2544.
- 86 Piotr Rybak, Robert Mroczkowski, Janusz Tracz, and Ireneusz Gawlik. 2020. Klej: Comprehensive  
87 benchmark for polish language understanding. In *Proceedings of the 58th Annual Meeting of the*  
88 *Association for Computational Linguistics*, pages 1191–1201.
- 89 Ali Safaya, Emirhan Kurtuluş, Arda Goktogan, and Deniz Yuret. 2022. Mukayese: Turkish nlp strikes  
90 back. In *Findings of the Association for Computational Linguistics: ACL 2022*, pages 846–863.
- 91 Haitham Seelawi, Ibraheem Tuffaha, Mahmoud Gzawi, Wael Farhan, Bashar Talafha, Riham Badawi,  
92 Zyad Sober, Oday Al-Dweik, Abed Alhakim Freihat, and Hussein Al-Natsheh. 2021. Alue:  
93 Arabic language understanding evaluation. In *Proceedings of the Sixth Arabic Natural Language*  
94 *Processing Workshop*, pages 173–184.
- 95 Tatiana Shavrina, Alena Fenogenova, Emelyanov Anton, Denis Shevelev, Ekaterina Artemova,  
96 Valentin Malykh, Vladislav Mikhailov, Maria Tikhonova, Andrey Chertok, and Andrey Evlampiev.  
97 2020. RussianSuperGLUE: A Russian language understanding evaluation benchmark. In *Proceed-*  
98 *ings of the 2020 Conference on Empirical Methods in Natural Language Processing (EMNLP)*,  
99 pages 4717–4726, Online. Association for Computational Linguistics.
- 100 Alex Wang, Yada Pruksachatkun, Nikita Nangia, Amanpreet Singh, Julian Michael, Felix Hill, Omer  
101 Levy, and Samuel Bowman. 2019. Superglue: A stickier benchmark for general-purpose language  
102 understanding systems. *Advances in neural information processing systems*, 32.
- 103 Alex Wang, Amanpreet Singh, Julian Michael, Felix Hill, Omer Levy, and Samuel R Bowman. 2018.  
104 Glue: A multi-task benchmark and analysis platform for natural language understanding. *arXiv*  
105 *preprint arXiv:1804.07461*.

- 106 Lijie Wang, Yaozong Shen, Shuyuan Peng, Shuai Zhang, Xinyan Xiao, Hao Liu, Hongxuan Tang,  
107 Ying Chen, Hua Wu, and Haifeng Wang. 2022. A fine-grained interpretability evaluation benchmark  
108 for neural nlp. *arXiv preprint arXiv:2205.11097*.
- 109 Bryan Wilie, Karissa Vincentio, Genta Indra Winata, Samuel Cahyawijaya, Xiaohong Li, Zhi Yuan  
110 Lim, Sidik Soleman, Rahmad Mahendra, Pascale Fung, Syafri Bahar, et al. 2020. Indonlu:  
111 Benchmark and resources for evaluating indonesian natural language understanding. In *Proceedings*  
112 *of the 1st Conference of the Asia-Pacific Chapter of the Association for Computational Linguistics*  
113 *and the 10th International Joint Conference on Natural Language Processing*, pages 843–857.
- 114 Liang Xu, Hai Hu, Xuanwei Zhang, Lu Li, Chenjie Cao, Yudong Li, Yechen Xu, Kai Sun, Dian  
115 Yu, Cong Yu, et al. 2020. Clue: A chinese language understanding evaluation benchmark. In  
116 *Proceedings of the 28th International Conference on Computational Linguistics*, pages 4762–4772.
- 117 Liang Xu, Xiaojing Lu, Chenyang Yuan, Xuanwei Zhang, Huilin Xu, Hu Yuan, Guoao Wei, Xiang  
118 Pan, Xin Tian, Libo Qin, et al. 2021. Fewclue: A chinese few-shot learning evaluation benchmark.  
119 *arXiv preprint arXiv:2107.07498*.
- 120 Yuan Yao, Qingxiu Dong, Jian Guan, Boxi Cao, Zhengyan Zhang, Chaojun Xiao, Xiaozhi Wang,  
121 Fanchao Qi, Junwei Bao, Jinran Nie, et al. 2021. Cuge: A chinese language understanding and  
122 generation evaluation benchmark. *arXiv preprint arXiv:2112.13610*.
- 123 Ningyu Zhang, Mosha Chen, Zhen Bi, Xiaozhuan Liang, Lei Li, Xin Shang, Kangping Yin, Chuanqi  
124 Tan, Jian Xu, Fei Huang, et al. 2021. Cblue: A chinese biomedical language understanding  
125 evaluation benchmark. *arXiv preprint arXiv:2106.08087*.
